# Supplementary material
Source: PubMed Central journal article supplement (PMC5927547)
Supplement: NIHMS950375-supplement-supplements.pdf [file NIHMS950375-supplement-supplements.pdf]

**Supplementary eTable 1. Stressful Life Events Scale-Dependent Events**

4. I was fired from a job.
7. Male: My girlfriend was pregnant.
19. I had problems at my job.
20. I did not get accepted to a school.
22. I lived with my boyfriend/ girlfriend.
24. I told someone really bad news.
26. I started dating someone.
27. I broke up with my boyfriend/ girlfriend.
28. I argued with my boyfriend/ girlfriend.
31. I was in the hospital or had an operation.
35. I fought more with my parents.
36. I argued more with other relatives (not parents).
38. I tried out for a sports team or club and did not make it.
40. I changed in physical appearance and did not like it (acne, etc.).
46. I was caught committing a crime.
52. I stopped talking to a good friend.
53. I fought with a good friend.
56. My job affected other aspects of life (school, homelife, social life).
65. I had problems being liked by classmates.
71. Females: I got pregnant. how did it affect you?
74. I stopped going to school. how did it affect you?
75. I fought with someone at school. how did it affect you?
76. I fought more with my brother/ sister.
78. I told someone that I was bisexual or homosexual.
79. I ran away from home.

**Supplementary eTable 2. Stressful Life Events Scale-Negative Events**

1. I had trouble with grades or schoolwork.
3. My parents were not home because of work.
4. I was fired from a job.
5. My parents hit each other (fight).
6. I testified in court.
7. Male: My girlfriend was pregnant.
8. My parents have problems at work.
9. I was robbed.
10. I got really bad news.
11. My pet died or ran away.
14. My family had money problems.
15. My parents divorced or separated.
16. My close friends or family members had trouble with the police.
17. I applied for a job and did not get hired.
19. I had problems at my job.
20. I did not get accepted to a school.
21. I had a bad accident or health problems.
24. I told someone really bad news.
25. A close friend died.
27. I broke up with my boyfriend/ girlfriend.
28. I argued with my boyfriend/ girlfriend.
31. I was in the hospital or had an operation.
32. A close friend or family member was robbed.
33. My close friend or relative was really sick.
34. I had problems with someone at work.
35. I fought more with my parents.
36. I argued more with other relatives (not parents).
37. A close relative died.
38. I tried out for a sports team or club and did not make it.
40. I changed in physical appearance and did not like it (acne, etc.).
41. I was sexually harrassed at school or work.
42. I broke off an engagement.
43. My family had problems buying or selling a house.
44. I was physically/ sexually abused by my boyfriend/girlfriend.
45. I was hurt or punched by someone.
46. I was caught committing a crime.
47. My close friend or family member was in the hospital or had an operation.
48. Females: I had an abortion.
49. I was bullied at school or in my neighborhood.

50. I did poorly on an important test.
51. There were problems with my house (overcrowded, needs to be fixed up, mice or insects).
52. I stopped talking to a good friend.
53. I fought with a good friend.
54. I had problems with family members, close friends, or classmates.
56. My job effected other aspects of life (school, homelife, social life).
57. I was sexually hurt or touched in private parts.
60. My parent was out of work or not working.
62. I had long term health problems.
63. My neighborhood was not safe (violence, crimes, gangs).
64. A close friend or family member was hurt badly.
65. I had problems being liked by classmates.
66. My close friends or family tried to hurt themselves.
67. My parents or brother/ sister died.
68. My parent was fired from his/ her job.
69. My brother/ sister fought more with my parents.
70. I saw something bad happen.
72. My parents had trouble getting along.
73. My home was damaged because of fire, flood, storm, tornado or other event.
74. I stopped going to school.
75. I fought with someone at school.
76. I fought more with my brother/ sister.
77. Males: My girlfriend had an abortion.
79. I ran away from home.
